# Supplementary material for: The future of feedback: Motivating performance improvement through future-focused feedback
Source: PubMed Central journal article supplement (PMC7304587; doi:10.1371/journal.pone.0234444), 2020-06-19
Supplement: pone.0234444.s015.pdf [file pone.0234444.s015.pdf]

**The future of feedback: Motivating performance improvement**  
 Jackie Gnepp, Joshua Klayman, Ian O. Williamson, Sema Barlas  
**S9 Analyses. Study 2 ANOVAs with between-groups comparisons.**

**General Linear Model (SPSS)**

**Group** = Pre-post or post-only **Role** = RM (Regional Manager--feedback provider) DM = (District Manger--feedback recipient). **succ\_fail** = ratings for recipient's successes or for failures Note: T2 indicates after feedback discussion; pre-discussion data are not used here.

**Percentage Internal Attributions (arcsine transformed)**

GLM arcIntrnlSucRMT2arcIntrnlFailRMT2arcIntrnlSucDMT2arcIntrnlFailDMT2BY Group

```

/WSFACTOR=role 2 Polynomial succ_fail 2 Polynomial
/MEASURE=pcInternal
/METHOD=SSTYPE(3)
/EMMEANS=TABLES(OVERALL)
/EMMEANS=TABLES(Group)
/EMMEANS=TABLES(role)
/EMMEANS=TABLES(succ_fail)
/EMMEANS=TABLES(Group*role)
/EMMEANS=TABLES(Group*succ_fail)
/EMMEANS=TABLES(role*succ_fail)
/EMMEANS=TABLES(Group*role*succ_fail)
/PRINT=ETASQ
/CRITERIA=ALPHA(.05)
/WSDESIGN=role succ_fail role*succ_fail
/DESIGN=Group.
    
```

**Within-Subjects Factors**

Measure: pcInternal

| role | succ_fail | Dependent Variable |
|------|-----------|--------------------|
| 1    | 1         | arcIntrnlSucRMT2   |
|      | 2         | arcIntrnlFailRMT2  |
| 2    | 1         | arcIntrnlSucDMT2   |
|      | 2         | arcIntrnlFailDMT2  |

**Between-Subjects Factors**

|         | Value Label   | N   |
|---------|---------------|-----|
| Group 1 | use pre-post  | 117 |
| 2       | use post-only | 68  |

**Tests of Within-Subjects Contrasts**

Measure: pclInternal

| Source                   | role   | succ_fail | Type III Sum of Squares | df  | Mean Square | F      |
|--------------------------|--------|-----------|-------------------------|-----|-------------|--------|
| role                     | Linear |           | .215                    | 1   | .215        | 1.120  |
| role * Group             | Linear |           | .021                    | 1   | .021        | .108   |
| Error(role)              | Linear |           | 35.071                  | 183 | .192        |        |
| succ_fail                |        | Linear    | 3.008                   | 1   | 3.008       | 19.256 |
| succ_fail * Group        |        | Linear    | .033                    | 1   | .033        | .213   |
| Error(succ_fail)         |        | Linear    | 28.585                  | 183 | .156        |        |
| role * succ_fail         | Linear | Linear    | 1.947                   | 1   | 1.947       | 12.208 |
| role * succ_fail * Group | Linear | Linear    | .377                    | 1   | .377        | 2.365  |
| Error(role*succ_fail)    | Linear | Linear    | 29.189                  | 183 | .160        |        |

**Tests of Within-Subjects Contrasts**

Measure: pclInternal

| Source                   | role   | succ_fail | Sig. | Partial Eta Squared |
|--------------------------|--------|-----------|------|---------------------|
| role                     | Linear |           | .291 | .006                |
| role * Group             | Linear |           | .742 | .001                |
| Error(role)              | Linear |           |      |                     |
| succ_fail                |        | Linear    | .000 | .095                |
| succ_fail * Group        |        | Linear    | .645 | .001                |
| Error(succ_fail)         |        | Linear    |      |                     |
| role * succ_fail         | Linear | Linear    | .001 | .063                |
| role * succ_fail * Group | Linear | Linear    | .126 | .013                |
| Error(role*succ_fail)    | Linear | Linear    |      |                     |

**Tests of Between-Subjects Effects**

Measure: pclInternal

Transformed Variable: Average

| Source    | Type III Sum of Squares | df  | Mean Square | F         | Sig. | Partial Eta Squared |
|-----------|-------------------------|-----|-------------|-----------|------|---------------------|
| Intercept | 2870.102                | 1   | 2870.102    | 13066.819 | .000 | .986                |
| Group     | .003                    | 1   | .003        | .013      | .911 | .000                |
| Error     | 40.196                  | 183 | .220        |           |      |                     |

## Estimated Marginal Means

### 1. Grand Mean

Measure: pclInternal

| Mean  | Std. Error | 95% Confidence Interval |             |
|-------|------------|-------------------------|-------------|
|       |            | Lower Bound             | Upper Bound |
| 2.042 | .018       | 2.007                   | 2.078       |

### 2. 1 =q'aries pre & post; 2 = q'aire post only

Measure: pclInternal

| 1 =q'aries pre & post; 2 =<br>q'aire post only | Mean  | Std. Error | 95% Confidence Interval |             |
|------------------------------------------------|-------|------------|-------------------------|-------------|
|                                                |       |            | Lower Bound             | Upper Bound |
| 1                                              | 2.040 | .022       | 1.998                   | 2.083       |
| 2                                              | 2.044 | .028       | 1.988                   | 2.100       |

### 3. role

Measure: pclInternal

| role | Mean  | Std. Error | 95% Confidence Interval |             |
|------|-------|------------|-------------------------|-------------|
|      |       |            | Lower Bound             | Upper Bound |
| 1    | 2.060 | .024       | 2.012                   | 2.108       |
| 2    | 2.025 | .025       | 1.976                   | 2.073       |

### 4. succ\_fail

Measure: pclInternal

| succ_fail | Mean  | Std. Error | 95% Confidence Interval |             |
|-----------|-------|------------|-------------------------|-------------|
|           |       |            | Lower Bound             | Upper Bound |
| 1         | 2.108 | .016       | 2.076                   | 2.141       |
| 2         | 1.976 | .029       | 1.920                   | 2.033       |

### 5. 1 =q'aries pre & post; 2 = q'aire post only \* role

Measure: pclInternal

| 1 =q'aries pre & post; 2 =<br>q'aire post only | role | Mean  | Std. Error | 95% Confidence Interval |             |
|------------------------------------------------|------|-------|------------|-------------------------|-------------|
|                                                |      |       |            | Lower Bound             | Upper Bound |
| 1                                              | 1    | 2.063 | .029       | 2.006                   | 2.121       |
|                                                | 2    | 2.017 | .030       | 1.958                   | 2.076       |
| 2                                              | 1    | 2.057 | .039       | 1.981                   | 2.132       |
|                                                | 2    | 2.032 | .039       | 1.955                   | 2.110       |

**6. 1 =q'aries pre & post; 2 = q'aire post only \* succ\_fail**

Measure: pclInternal

| 1 =q'aries pre & post; 2 =<br>q'aire post only |   | succ_fail | Mean  | Std. Error | 95% Confidence Interval |             |
|------------------------------------------------|---|-----------|-------|------------|-------------------------|-------------|
|                                                |   |           |       |            | Lower Bound             | Upper Bound |
| 1                                              | 1 |           | 2.099 | .020       | 2.060                   | 2.139       |
|                                                | 2 |           | 1.981 | .035       | 1.913                   | 2.050       |
| 2                                              | 1 |           | 2.117 | .026       | 2.066                   | 2.169       |
|                                                | 2 |           | 1.971 | .046       | 1.881                   | 2.061       |

**7. role \* succ\_fail**

Measure: pclInternal

| role | succ_fail | Mean  | Std. Error | 95% Confidence Interval |             |
|------|-----------|-------|------------|-------------------------|-------------|
|      |           |       |            | Lower Bound             | Upper Bound |
| 1    | 1         | 2.073 | .025       | 2.025                   | 2.121       |
|      | 2         | 2.047 | .035       | 1.977                   | 2.117       |
| 2    | 1         | 2.144 | .025       | 2.094                   | 2.194       |
|      | 2         | 1.905 | .042       | 1.823                   | 1.987       |

**8. 1 =q'aries pre & post; 2 = q'aire post only \* role \* succ\_fail**

Measure: pclInternal

| 1 =q'aries pre & post; 2 =<br>q'aire post only |      |   | succ_fail | Mean  | Std. Error | 95% Confidence Interval |             |
|------------------------------------------------|------|---|-----------|-------|------------|-------------------------|-------------|
|                                                | role |   |           |       |            | Lower Bound             | Upper Bound |
| 1                                              | 1    | 1 |           | 2.046 | .030       | 1.987                   | 2.105       |
|                                                |      | 2 |           | 2.081 | .043       | 1.996                   | 2.166       |
|                                                | 2    | 1 |           | 2.153 | .031       | 2.092                   | 2.213       |
|                                                |      | 2 |           | 1.881 | .050       | 1.782                   | 1.981       |
| 2                                              | 1    | 1 |           | 2.100 | .039       | 2.023                   | 2.177       |
|                                                |      | 2 |           | 2.013 | .056       | 1.902                   | 2.124       |
|                                                | 2    | 1 |           | 2.135 | .040       | 2.056                   | 2.214       |
|                                                |      | 2 |           | 1.929 | .066       | 1.799                   | 2.060       |

**Performance quality ratings**

**SalesPerf** = rating for sales, i.e. successes; **LowPerfs** = average rating for low-performance aspects, i.e. failures

```
GLM SalesPerfRMT2 LowPerfsRMT2 SalesPerfDMT2 LowPerfsDMT2 BY Wave
  /WSFACTOR=role 2 Polynomial succ_fail 2 Polynomial
  /MEASURE=PerformanceQuality
  /METHOD=SSTYPE(3)
  /EMMEANS=TABLES(OVERALL)
```

```

/EMMEANS=TABLES(Group)
/EMMEANS=TABLES(role)
/EMMEANS=TABLES(succ_fail)
/EMMEANS=TABLES(Group*role)
/EMMEANS=TABLES(Group*succ_fail)
/EMMEANS=TABLES(role*succ_fail)
/EMMEANS=TABLES(Group*role*succ_fail)
/PRINT=ETASQ
/CRITERIA=ALPHA(.05)
/WSDESIGN=role succ_fail role*succ_fail
/DESIGN=Group.

```

### Within-Subjects Factors

Measure: PerformanceQuality

| role | succ_fail | Dependent Variable |
|------|-----------|--------------------|
| 1    | 1         | SalesPerRM T2      |
|      | 2         | LowPerfsRMT 2      |
| 2    | 1         | SalesPerDM T2      |
|      | 2         | LowPerfsDMT 2      |

### Between-Subjects Factors

|       |   | Value Label   | N   |
|-------|---|---------------|-----|
| Group | 1 | use pre-post  | 116 |
|       | 2 | use post-only | 66  |

### Tests of Within-Subjects Contrasts

Measure: PerformanceQuality

| Source                   | role   | succ_fail | Type III Sum of Squares | df  | Mean Square | F        |
|--------------------------|--------|-----------|-------------------------|-----|-------------|----------|
| role                     | Linear |           | 5.935                   | 1   | 5.935       | 10.677   |
| role * Group             | Linear |           | 1.305                   | 1   | 1.305       | 2.347    |
| Error(role)              | Linear |           | 100.050                 | 180 | .556        |          |
| succ_fail                | Linear |           | 1964.996                | 1   | 1964.996    | 3231.344 |
| succ_fail * Group        | Linear |           | .019                    | 1   | .019        | .032     |
| Error(succ_fail)         | Linear |           | 109.459                 | 180 | .608        |          |
| role * succ_fail         | Linear | Linear    | .241                    | 1   | .241        | .449     |
| role * succ_fail * Group | Linear | Linear    | .032                    | 1   | .032        | .060     |
| Error(role*succ_fail)    | Linear | Linear    | 96.686                  | 180 | .537        |          |

### Tests of Within-Subjects Contrasts

Measure: PerformanceQuality

| Source                   | role   | succ_fail | Sig. | Partial Eta Squared |
|--------------------------|--------|-----------|------|---------------------|
| role                     | Linear |           | .001 | .056                |
| role * Group             | Linear |           | .127 | .013                |
| Error(role)              | Linear |           |      |                     |
| succ_fail                |        | Linear    | .000 | .947                |
| succ_fail * Group        |        | Linear    | .859 | .000                |
| Error(succ_fail)         |        | Linear    |      |                     |
| role * succ_fail         | Linear | Linear    | .504 | .002                |
| role * succ_fail * Group | Linear | Linear    | .806 | .000                |
| Error(role*succ_fail)    | Linear | Linear    |      |                     |

### Tests of Between-Subjects Effects

Measure: PerformanceQuality

Transformed Variable: Average

| Source    | Type III Sum of Squares | df  | Mean Square | F         | Sig. | Partial Eta Squared |
|-----------|-------------------------|-----|-------------|-----------|------|---------------------|
| Intercept | 16849.678               | 1   | 16849.678   | 25072.582 | .000 | .993                |
| Group     | 1.258                   | 1   | 1.258       | 1.872     | .173 | .010                |
| Error     | 120.966                 | 180 | .672        |           |      |                     |

### Estimated Marginal Means

#### 1. Grand Mean

Measure: PerformanceQuality

| Mean  | Std. Error | 95% Confidence Interval |             |
|-------|------------|-------------------------|-------------|
|       |            | Lower Bound             | Upper Bound |
| 5.003 | .032       | 4.941                   | 5.066       |

#### 2. 1 =q'aries pre & post; 2 = q'aire post only

Measure: PerformanceQuality

| 1 =q'aries pre & post; 2 = q'aire post only | Mean  | Std. Error | 95% Confidence Interval |             |
|---------------------------------------------|-------|------------|-------------------------|-------------|
|                                             |       |            | Lower Bound             | Upper Bound |
| 1                                           | 5.047 | .038       | 4.972                   | 5.122       |
| 2                                           | 4.960 | .050       | 4.861                   | 5.060       |

### 3. role

Measure: PerformanceQuality

| role | Mean  | Std. Error | 95% Confidence Interval |             |
|------|-------|------------|-------------------------|-------------|
|      |       |            | Lower Bound             | Upper Bound |
| 1    | 4.910 | .044       | 4.822                   | 4.997       |
| 2    | 5.097 | .041       | 5.016                   | 5.179       |

### 4. succ\_fail

Measure: PerformanceQuality

| succ_fail | Mean  | Std. Error | 95% Confidence Interval |             |
|-----------|-------|------------|-------------------------|-------------|
|           |       |            | Lower Bound             | Upper Bound |
| 1         | 6.712 | .034       | 6.646                   | 6.778       |
| 2         | 3.295 | .052       | 3.193                   | 3.397       |

### 5. 1 =q'aries pre & post; 2 = q'aire post only \* role

Measure: PerformanceQuality

| 1 =q'aries pre & post; 2 =<br>q'aire post only | role | Mean  | Std. Error | 95% Confidence Interval |             |
|------------------------------------------------|------|-------|------------|-------------------------|-------------|
|                                                |      |       |            | Lower Bound             | Upper Bound |
| 1                                              | 1    | 4.909 | .053       | 4.804                   | 5.014       |
|                                                | 2    | 5.185 | .050       | 5.087                   | 5.283       |
| 2                                              | 1    | 4.910 | .071       | 4.771                   | 5.050       |
|                                                | 2    | 5.010 | .066       | 4.880                   | 5.140       |

### 6. 1 =q'aries pre & post; 2 = q'aire post only \* succ\_fail

Measure: PerformanceQuality

| 1 =q'aries pre & post; 2 =<br>q'aire post only | succ_fail | Mean  | Std. Error | 95% Confidence Interval |             |
|------------------------------------------------|-----------|-------|------------|-------------------------|-------------|
|                                                |           |       |            | Lower Bound             | Upper Bound |
| 1                                              | 1         | 6.750 | .040       | 6.670                   | 6.830       |
|                                                | 2         | 3.343 | .062       | 3.220                   | 3.466       |
| 2                                              | 1         | 6.674 | .053       | 6.569                   | 6.780       |
|                                                | 2         | 3.246 | .083       | 3.083                   | 3.409       |

### 7. role \* succ\_fail

Measure: PerformanceQuality

| role | succ_fail | Mean  | Std. Error | 95% Confidence Interval |             |
|------|-----------|-------|------------|-------------------------|-------------|
|      |           |       |            | Lower Bound             | Upper Bound |
| 1    | 1         | 6.637 | .051       | 6.537                   | 6.737       |
|      | 2         | 3.182 | .065       | 3.053                   | 3.311       |
| 2    | 1         | 6.787 | .041       | 6.706                   | 6.868       |
|      | 2         | 3.408 | .075       | 3.261                   | 3.555       |

8. 1 =q'aries pre & post; 2 = q'aire post only \* role \* succ\_fail

Measure: PerformanceQuality

| 1 =q'aries pre & post; 2 =<br>q'aire post only | role | succ_fail | Mean  | Std. Error | 95% Confidence Interval |             |
|------------------------------------------------|------|-----------|-------|------------|-------------------------|-------------|
|                                                |      |           |       |            | Lower Bound             | Upper Bound |
| 1                                              | 1    | 1         | 6.638 | .061       | 6.517                   | 6.759       |
|                                                |      | 2         | 3.180 | .079       | 3.024                   | 3.335       |
|                                                | 2    | 1         | 6.862 | .050       | 6.764                   | 6.960       |
|                                                |      | 2         | 3.507 | .090       | 3.330                   | 3.684       |
| 2                                              | 1    | 1         | 6.636 | .081       | 6.476                   | 6.796       |
|                                                |      | 2         | 3.184 | .104       | 2.978                   | 3.390       |
|                                                | 2    | 1         | 6.712 | .066       | 6.582                   | 6.842       |
|                                                |      | 2         | 3.308 | .119       | 3.073                   | 3.543       |

### Performance importance ratings

. **SalesImp** = rating for sales, i.e. successes; **LowPerfsImp** = average rating for low-performance aspects, i.e. failures

GLM SaleImpRMT2 LowPerfsImpRMT2 SaleImpDMT2 LowPerfsImpDMT2 BY Wave

/WSFACTOR=role 2 Polynomial succ\_fail 2 Polynomial

/MEASURE=PerformanceImportance

/METHOD=SSTYPE(3)

/EMMEANS=TABLES(OVERALL)

/EMMEANS=TABLES(Group)

/EMMEANS=TABLES(role)

/EMMEANS=TABLES(succ\_fail)

/EMMEANS=TABLES(Group\*role)

/EMMEANS=TABLES(Group\*succ\_fail)

/EMMEANS=TABLES(role\*succ\_fail)

/EMMEANS=TABLES(Group\*role\*succ\_fail)

/PRINT=ETASQ

/CRITERIA=ALPHA(.05)

/WSDESIGN=role succ\_fail role\*succ\_fail

/DESIGN=Group.



**Within-Subjects Factors**

Measure: PerformancImportance

| role | succ_fail | Dependent Variable |
|------|-----------|--------------------|
| 1    | 1         | SaleImpRMT2        |
|      | 2         | LowPerfslmp RMT2   |
| 2    | 1         | SaleImpDMT2        |
|      | 2         | LowPerfslmp DMT2   |

**Between-Subjects Factors**

|       |   | Value Label   | N   |
|-------|---|---------------|-----|
| Group | 1 | use pre-post  | 115 |
|       | 2 | use post-only | 67  |

**Tests of Within-Subjects Contrasts**

Measure: PerformancImportance

| Source                   | role   | succ_fail | Type III Sum of Squares | df  | Mean Square | F      |
|--------------------------|--------|-----------|-------------------------|-----|-------------|--------|
| role                     | Linear |           | 1.939                   | 1   | 1.939       | 2.047  |
| role * Group             | Linear |           | .532                    | 1   | .532        | .561   |
| Error(role)              | Linear |           | 170.505                 | 180 | .947        |        |
| succ_fail                | Linear |           | 97.615                  | 1   | 97.615      | 64.782 |
| succ_fail * Group        | Linear |           | .133                    | 1   | .133        | .089   |
| Error(succ_fail)         | Linear |           | 271.227                 | 180 | 1.507       |        |
| role * succ_fail         | Linear | Linear    | 1.547                   | 1   | 1.547       | 1.377  |
| role * succ_fail * Group | Linear | Linear    | .179                    | 1   | .179        | .160   |
| Error(role*succ_fail)    | Linear | Linear    | 202.179                 | 180 | 1.123       |        |

### Tests of Within-Subjects Contrasts

Measure: Performancelmportance

| Source                   | role   | succ_fail | Sig. | Partial Eta Squared |
|--------------------------|--------|-----------|------|---------------------|
| role                     | Linear |           | .154 | .011                |
| role * Group             | Linear |           | .455 | .003                |
| Error(role)              | Linear |           |      |                     |
| succ_fail                |        | Linear    | .000 | .265                |
| succ_fail * Group        |        | Linear    | .766 | .000                |
| Error(succ_fail)         |        | Linear    |      |                     |
| role * succ_fail         | Linear | Linear    | .242 | .008                |
| role * succ_fail * Group | Linear | Linear    | .690 | .001                |
| Error(role*succ_fail)    | Linear | Linear    |      |                     |

### Tests of Between-Subjects Effects

Measure: Performancelmportance

Transformed Variable: Average

| Source    | Type III Sum of Squares | df  | Mean Square | F         | Sig. | Partial Eta Squared |
|-----------|-------------------------|-----|-------------|-----------|------|---------------------|
| Intercept | 24320.790               | 1   | 24320.790   | 27613.623 | .000 | .994                |
| Group     | 2.605                   | 1   | 2.605       | 2.958     | .087 | .016                |
| Error     | 158.536                 | 180 | .881        |           |      |                     |

### Estimated Marginal Means

#### 1. Grand Mean

Measure: Performancelmportance

| Mean  | Std. Error | 95% Confidence Interval |             |
|-------|------------|-------------------------|-------------|
|       |            | Lower Bound             | Upper Bound |
| 5.992 | .036       | 5.921                   | 6.063       |

#### 2. 1 =q'aries pre & post; 2 = q'aire post only

Measure: Performancelmportance

| 1 =q'aries pre & post; 2 = q'aire post only | Mean  | Std. Error | 95% Confidence Interval |             |
|---------------------------------------------|-------|------------|-------------------------|-------------|
|                                             |       |            | Lower Bound             | Upper Bound |
| 1                                           | 5.930 | .044       | 5.844                   | 6.016       |
| 2                                           | 6.054 | .057       | 5.941                   | 6.167       |

**3. role**

Measure: PerformancImportance

| role | Mean  | Std. Error | 95% Confidence Interval |             |
|------|-------|------------|-------------------------|-------------|
|      |       |            | Lower Bound             | Upper Bound |
| 1    | 5.939 | .056       | 5.828                   | 6.049       |
| 2    | 6.046 | .048       | 5.952                   | 6.140       |

**4. succ\_fail**

Measure: PerformancImportance

| succ_fail | Mean  | Std. Error | 95% Confidence Interval |             |
|-----------|-------|------------|-------------------------|-------------|
|           |       |            | Lower Bound             | Upper Bound |
| 1         | 6.372 | .047       | 6.278                   | 6.465       |
| 2         | 5.612 | .069       | 5.476                   | 5.749       |

**5. 1 =q'aries pre & post; 2 = q'aire post only \* role**

Measure: PerformancImportance

| 1 =q'aries pre & post; 2 =<br>q'aire post only | role | Mean  | Std. Error | 95% Confidence Interval |             |
|------------------------------------------------|------|-------|------------|-------------------------|-------------|
|                                                |      |       |            | Lower Bound             | Upper Bound |
| 1                                              | 1    | 5.849 | .068       | 5.715                   | 5.982       |
|                                                | 2    | 6.012 | .058       | 5.897                   | 6.126       |
| 2                                              | 1    | 6.029 | .089       | 5.853                   | 6.204       |
|                                                | 2    | 6.080 | .076       | 5.930                   | 6.229       |

**6. 1 =q'aries pre & post; 2 = q'aire post only \* succ\_fail**

Measure: PerformancImportance

| 1 =q'aries pre & post; 2 =<br>q'aire post only | succ_fail | Mean  | Std. Error | 95% Confidence Interval |             |
|------------------------------------------------|-----------|-------|------------|-------------------------|-------------|
|                                                |           |       |            | Lower Bound             | Upper Bound |
| 1                                              | 1         | 6.296 | .058       | 6.182                   | 6.409       |
|                                                | 2         | 5.564 | .084       | 5.399                   | 5.730       |
| 2                                              | 1         | 6.448 | .075       | 6.299                   | 6.596       |
|                                                | 2         | 5.660 | .110       | 5.443                   | 5.878       |

**7. role \* succ\_fail**

Measure: PerformancImportance

| role | succ_fail | Mean  | Std. Error | 95% Confidence Interval |             |
|------|-----------|-------|------------|-------------------------|-------------|
|      |           |       |            | Lower Bound             | Upper Bound |
| 1    | 1         | 6.270 | .067       | 6.138                   | 6.402       |
|      | 2         | 5.607 | .101       | 5.407                   | 5.806       |
| 2    | 1         | 6.473 | .067       | 6.341                   | 6.605       |
|      | 2         | 5.618 | .085       | 5.451                   | 5.785       |

8. 1 =q'aries pre & post; 2 = q'aire post only \* role \* succ\_fail

Measure: Performancelmportance

| 1 =q'aries pre & post; 2 =<br>q'aire post only | role | succ_fail | Mean  | Std. Error | 95% Confidence Interval |             |
|------------------------------------------------|------|-----------|-------|------------|-------------------------|-------------|
|                                                |      |           |       |            | Lower Bound             | Upper Bound |
| 1                                              | 1    | 1         | 6.183 | .081       | 6.022                   | 6.343       |
|                                                |      | 2         | 5.514 | .123       | 5.272                   | 5.757       |
|                                                | 2    | 1         | 6.409 | .081       | 6.248                   | 6.569       |
|                                                |      | 2         | 5.614 | .103       | 5.412                   | 5.817       |
| 2                                              | 1    | 1         | 6.358 | .106       | 6.148                   | 6.568       |
|                                                |      | 2         | 5.699 | .161       | 5.382                   | 6.016       |
|                                                | 2    | 1         | 6.537 | .106       | 6.327                   | 6.747       |
|                                                |      | 2         | 5.622 | .134       | 5.357                   | 5.887       |

Ratings of feedback accuracy (FeedAcc), qualifications of provider (Qualified), and favorability of feedback (FeedContent)

GLM FeedAccRMT2 FeedAccDMT2 QualifiedRMT2 QualifiedDMT2 FeedContentRMT2 FeedContentDMT2 BY Group

```

/WSFACTOR=RoleRM_DM 2 Polynomial
/MEASURE=Accuracy Qualification Favorability
/METHOD=SSTYPE(3)
/EMMEANS=TABLES(OVERALL)
/EMMEANS=TABLES(Group)
/EMMEANS=TABLES(RoleRM_DM)
/EMMEANS=TABLES(Group*RoleRM_DM)
/PRINT=DESCRIPTIVE ETASQ
/CRITERIA=ALPHA(.05)
/WSDESIGN=RoleRM_DM
/DESIGN=Group.

```

**Within-Subjects Factors**

| Measure       | RoleRM_DM | Dependent Variable  |
|---------------|-----------|---------------------|
| Accuracy      | 1         | FeedAccRMT<br>2     |
|               | 2         | FeedAccDMT<br>2     |
| Qualification | 1         | QualifiedRMT<br>2   |
|               | 2         | QualifiedDMT<br>2   |
| Favorability  | 1         | FeedContent<br>RMT2 |
|               | 2         | FeedContent<br>DMT2 |

**Between-Subjects Factors**

|         | Value Label   | N   |
|---------|---------------|-----|
| Group 1 | use pre-post  | 117 |
| Group 2 | use post-only | 67  |

**Tests of Within-Subjects Contrasts**

| Source            | Measure       | RoleRM_DM | Type III Sum of Squares | df  | Mean Square |
|-------------------|---------------|-----------|-------------------------|-----|-------------|
| RoleRM_DM         | Accuracy      | Linear    | 3.786                   | 1   | 3.786       |
|                   | Qualification | Linear    | 12.010                  | 1   | 12.010      |
|                   | Favorability  | Linear    | .298                    | 1   | .298        |
| RoleRM_DM * Group | Accuracy      | Linear    | 522.265                 | 1   | 522.265     |
|                   | Qualification | Linear    | 4.184                   | 1   | 4.184       |
|                   | Favorability  | Linear    | .811                    | 1   | .811        |
| Error(RoleRM_DM)  | Accuracy      | Linear    | 50720.602               | 182 | 278.685     |
|                   | Qualification | Linear    | 835.675                 | 182 | 4.592       |
|                   | Favorability  | Linear    | 431.341                 | 182 | 2.370       |

**Tests of Within-Subjects Contrasts**

| Source            | Measure       | RoleRM_DM | F     | Sig. | Partial Eta Squared |
|-------------------|---------------|-----------|-------|------|---------------------|
| RoleRM_DM         | Accuracy      | Linear    | .014  | .907 | .000                |
|                   | Qualification | Linear    | 2.616 | .108 | .014                |
|                   | Favorability  | Linear    | .126  | .723 | .001                |
| RoleRM_DM * Group | Accuracy      | Linear    | 1.874 | .173 | .010                |
|                   | Qualification | Linear    | .911  | .341 | .005                |
|                   | Favorability  | Linear    | .342  | .559 | .002                |
| Error(RoleRM_DM)  | Accuracy      | Linear    |       |      |                     |
|                   | Qualification | Linear    |       |      |                     |
|                   | Favorability  | Linear    |       |      |                     |

**Tests of Between-Subjects Effects**

Transformed Variable: Average

| Source    | Measure       | Type III Sum of Squares | df  | Mean Square | F        | Sig. |
|-----------|---------------|-------------------------|-----|-------------|----------|------|
| Intercept | Accuracy      | 1972328.971             | 1   | 1972328.971 | 5704.356 | .000 |
|           | Qualification | 8810.909                | 1   | 8810.909    | 1556.807 | .000 |
|           | Favorability  | 9778.965                | 1   | 9778.965    | 2226.978 | .000 |
| Group     | Accuracy      | 214.840                 | 1   | 214.840     | .621     | .432 |
|           | Qualification | 5.692                   | 1   | 5.692       | 1.006    | .317 |
|           | Favorability  | 16.778                  | 1   | 16.778      | 3.821    | .052 |
| Error     | Accuracy      | 62928.027               | 182 | 345.758     |          |      |
|           | Qualification | 1030.048                | 182 | 5.660       |          |      |
|           | Favorability  | 799.187                 | 182 | 4.391       |          |      |

**Tests of Between-Subjects Effects**

Transformed Variable: Average

| Source    | Measure       | Partial Eta Squared |
|-----------|---------------|---------------------|
| Intercept | Accuracy      | .969                |
|           | Qualification | .895                |
|           | Favorability  | .924                |
| Group     | Accuracy      | .003                |
|           | Qualification | .005                |
|           | Favorability  | .021                |
| Error     | Accuracy      |                     |
|           | Qualification |                     |
|           | Favorability  |                     |

## Estimated Marginal Means

### 1. Grand Mean

| Measure       | Mean   | Std. Error | 95% Confidence Interval |             |
|---------------|--------|------------|-------------------------|-------------|
|               |        |            | Lower Bound             | Upper Bound |
| Accuracy      | 76.072 | 1.007      | 74.084                  | 78.059      |
| Qualification | 5.084  | .129       | 4.830                   | 5.339       |
| Favorability  | 5.356  | .114       | 5.133                   | 5.580       |

### 2. 1 =q'aries pre & post; 2 = q'aire post only

| Measure       | 1 =q'aries pre & post; 2 =<br>q'aire post only | Mean   | Std. Error | 95% Confidence Interval |             |
|---------------|------------------------------------------------|--------|------------|-------------------------|-------------|
|               |                                                |        |            | Lower Bound             | Upper Bound |
| Accuracy      | 1                                              | 75.278 | 1.216      | 72.879                  | 77.676      |
|               | 2                                              | 76.866 | 1.606      | 73.696                  | 80.035      |
| Qualification | 1                                              | 5.214  | .156       | 4.907                   | 5.521       |
|               | 2                                              | 4.955  | .206       | 4.550                   | 5.361       |
| Favorability  | 1                                              | 5.135  | .137       | 4.864                   | 5.405       |
|               | 2                                              | 5.578  | .181       | 5.221                   | 5.936       |

### 3. RoleRM\_DM

| Measure       | RoleRM_DM | Mean   | Std. Error | 95% Confidence Interval |             |
|---------------|-----------|--------|------------|-------------------------|-------------|
|               |           |        |            | Lower Bound             | Upper Bound |
| Accuracy      | 1         | 75.966 | 1.136      | 73.724                  | 78.208      |
|               | 2         | 76.177 | 1.540      | 73.138                  | 79.217      |
| Qualification | 1         | 5.272  | .163       | 4.950                   | 5.594       |
|               | 2         | 4.897  | .183       | 4.535                   | 5.258       |
| Favorability  | 1         | 5.386  | .121       | 5.147                   | 5.625       |
|               | 2         | 5.327  | .158       | 5.015                   | 5.639       |

**4. 1 =q'aries pre & post; 2 = q'aire post only \* RoleRM\_DM**

| Measure       | 1 =q'aries pre & post; 2 =<br>q'aire post only | RoleRM_DM | Mean   | Std. Error | 95% ...     |
|---------------|------------------------------------------------|-----------|--------|------------|-------------|
|               |                                                |           |        |            | Lower Bound |
| Accuracy      | 1                                              | 1         | 76.410 | 1.371      | 73.704      |
|               |                                                | 2         | 74.145 | 1.859      | 70.477      |
|               | 2                                              | 1         | 75.522 | 1.812      | 71.947      |
|               |                                                | 2         | 78.209 | 2.457      | 73.362      |
| Qualification | 1                                              | 1         | 5.291  | .197       | 4.902       |
|               |                                                | 2         | 5.137  | .221       | 4.701       |
|               | 2                                              | 1         | 5.254  | .260       | 4.741       |
|               |                                                | 2         | 4.657  | .292       | 4.080       |
| Favorability  | 1                                              | 1         | 5.115  | .146       | 4.827       |
|               |                                                | 2         | 5.154  | .191       | 4.777       |
|               | 2                                              | 1         | 5.657  | .193       | 5.276       |
|               |                                                | 2         | 5.500  | .252       | 5.002       |

**4. 1 =q'aries pre & post; 2 = q'aire post only \* RoleRM\_DM**

| Measure       | 1 =q'aries pre & post; 2 =<br>q'aire post only | RoleRM_DM | 95% Confidence |
|---------------|------------------------------------------------|-----------|----------------|
|               |                                                |           | Upper Bound    |
| Accuracy      | 1                                              | 1         | 79.116         |
|               |                                                | 2         | 77.814         |
|               | 2                                              | 1         | 79.098         |
|               |                                                | 2         | 83.056         |
| Qualification | 1                                              | 1         | 5.679          |
|               |                                                | 2         | 5.573          |
|               | 2                                              | 1         | 5.767          |
|               |                                                | 2         | 5.233          |
| Favorability  | 1                                              | 1         | 5.403          |
|               |                                                | 2         | 5.531          |
|               | 2                                              | 1         | 6.037          |
|               |                                                | 2         | 5.998          |
